# Supplementary material for: Identification of Potential Lead Compounds Targeting Novel Druggable Cavity of SARS-CoV-2 Spike Trimer by Molecular Dynamics Simulations
Source: MDPI journal article supplement (doi:10.3390/ijms24076281), 2023-03-27
Supplement: s1 [file s1]

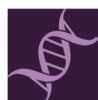

Article

# Identification of Potential Lead Compounds Targeting Novel Druggable Cavity of SARS-CoV-2 Spike Trimer by Molecular Dy-Namics Simulations

Yizhen Zhao<sup>1,†</sup>, Yifan Zhao<sup>1,†</sup>, Linke Xie<sup>1</sup>, Qian Li<sup>2</sup>, Yuze Zhang<sup>1</sup>, Yongjian Zang<sup>1</sup>, Xuhua Li<sup>1</sup>, Lei Zhang<sup>1</sup> and Zhiwei Yang<sup>1,2,\*</sup>

<sup>1</sup> MOE Key Laboratory for Nonequilibrium Synthesis and Modulation of Condensed Matter, School of Physics, Xi'an Jiaotong University, Xi'an 710049, China

<sup>2</sup> School of Life Science and Technology, Xi'an Jiaotong University, Xi'an 710049, China

\* Correspondence: yzws-123@xjtu.edu.cn

† These authors contributed equally to this work.

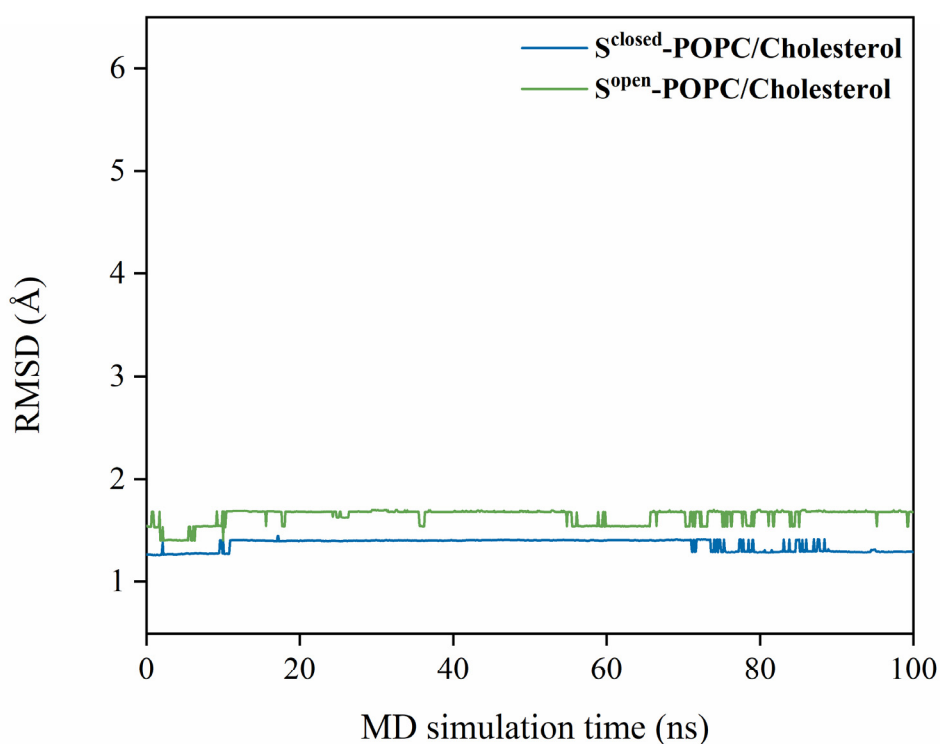

**Figure S1.** RMSD of  $S^{\text{closed}}$ -POPC/cholesterol and  $S^{\text{open}}$ -POPC/cholesterol systems.

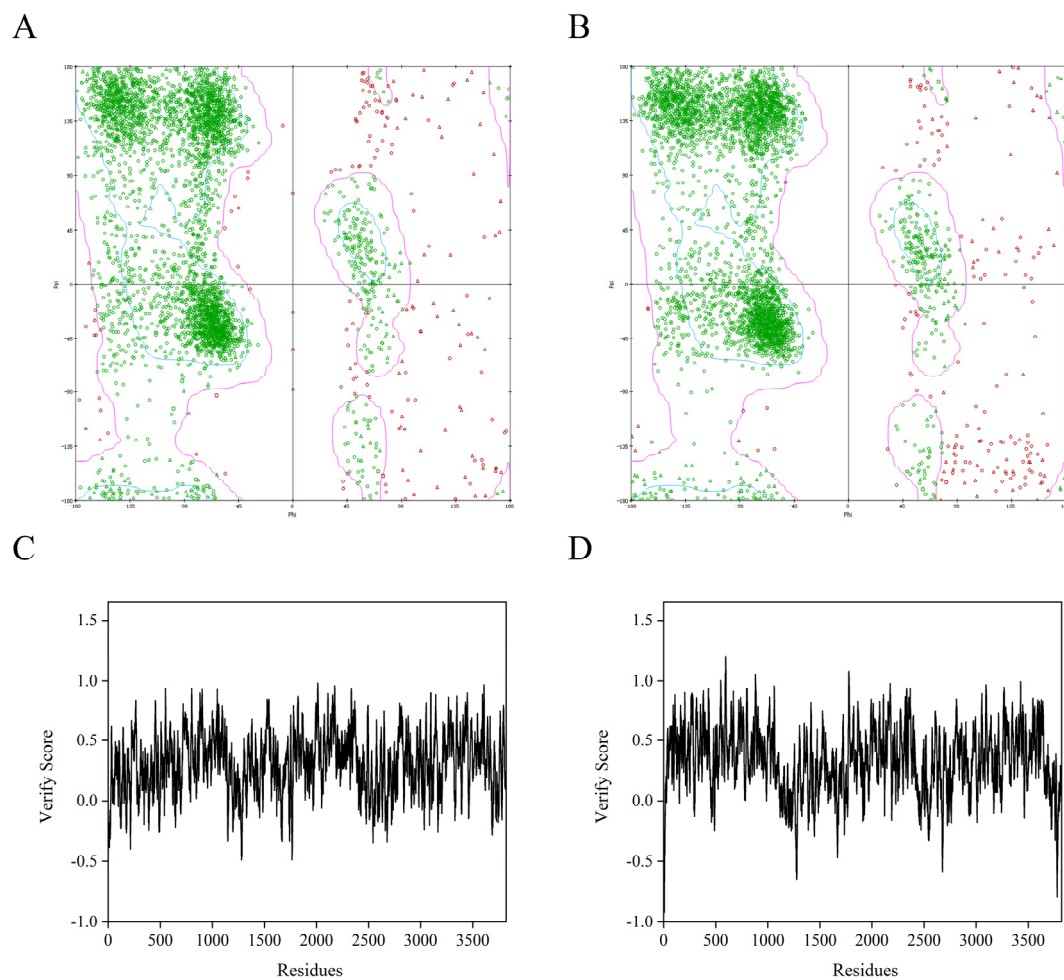

**Figure S2.** The Ramachandran plots of (A)  $S^{\text{closed}}$  and (B)  $S^{\text{open}}$ . The Profile-3D plots of (C)  $S^{\text{closed}}$  and (D)  $S^{\text{open}}$ . The homology modeling structures of  $S^{\text{closed}}$  and  $S^{\text{open}}$  are associated with 90% residues being in allowed region of Ramachandran plot (Procheck program) and 90% residues exhibiting reasonable folding (Profile-3D program).

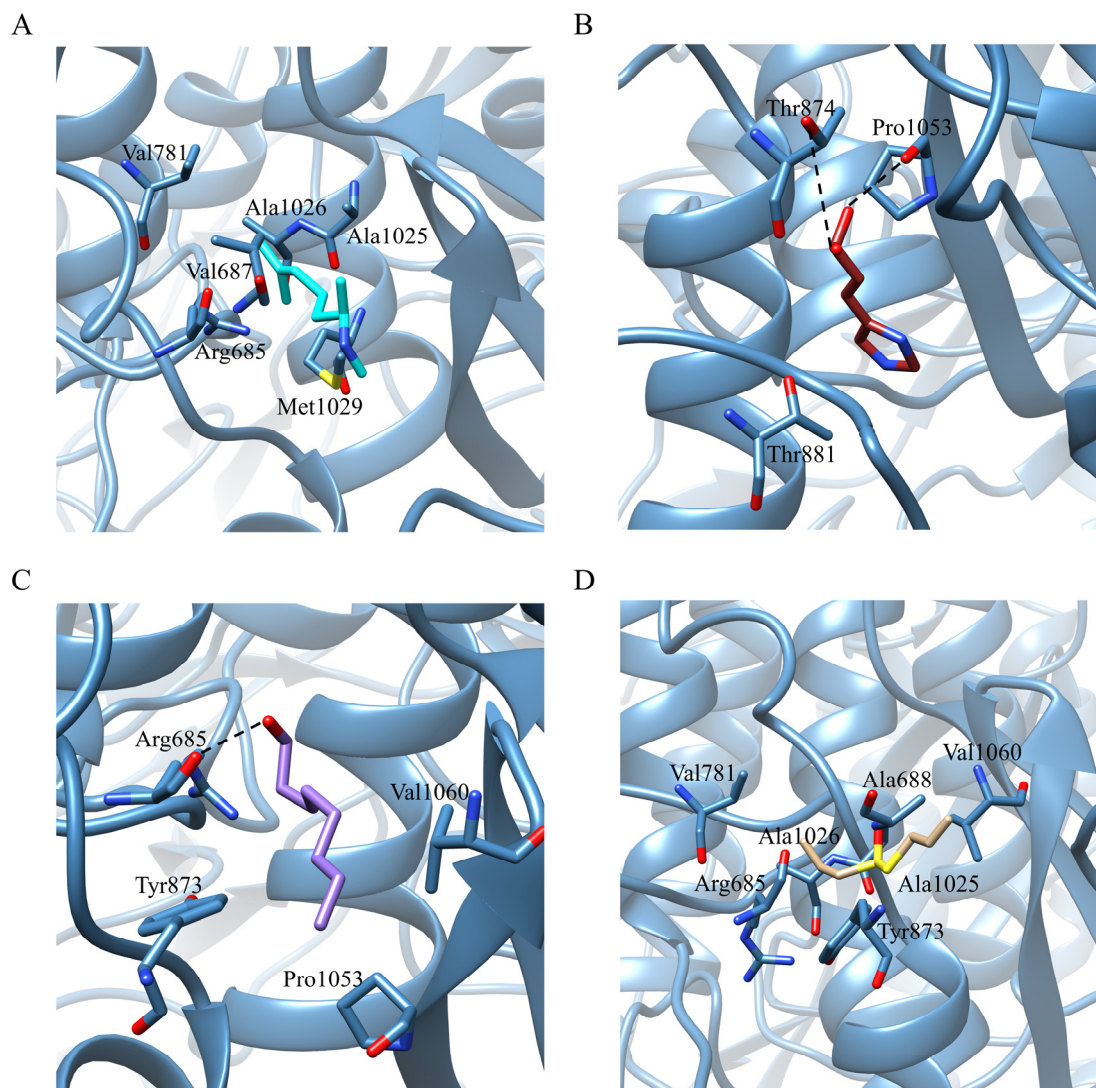

**Figure S3.** The binding interface of  $S^{\text{closed}}$  structure and (A) isomethheptene, (B) urocanic acid, (C) 1-octanol and (D) allicin. The key residues are represented by stick models, and the important H-bonding interactions are labeled in the black lines.

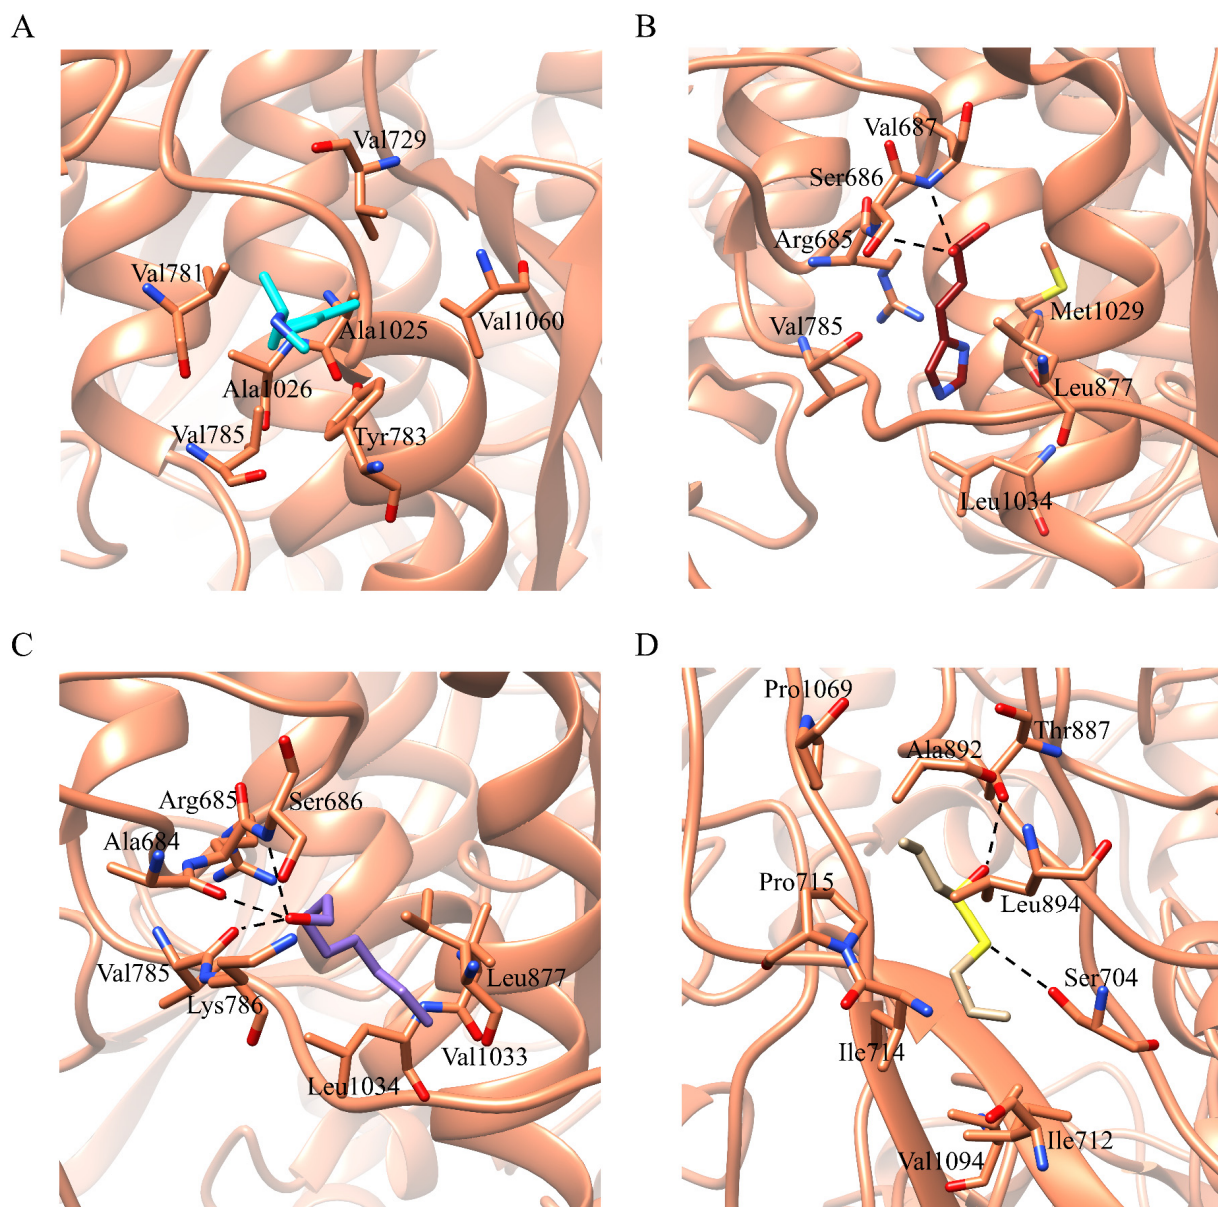

**Figure S4.** The binding interface of *Sopen* structure and (A) isomethheptene, (B) urocanic acid, (C) 1-octanol and (D) allicin. The key residues are represented by stick models, and the important H-bonding interactions are labeled in the black lines.

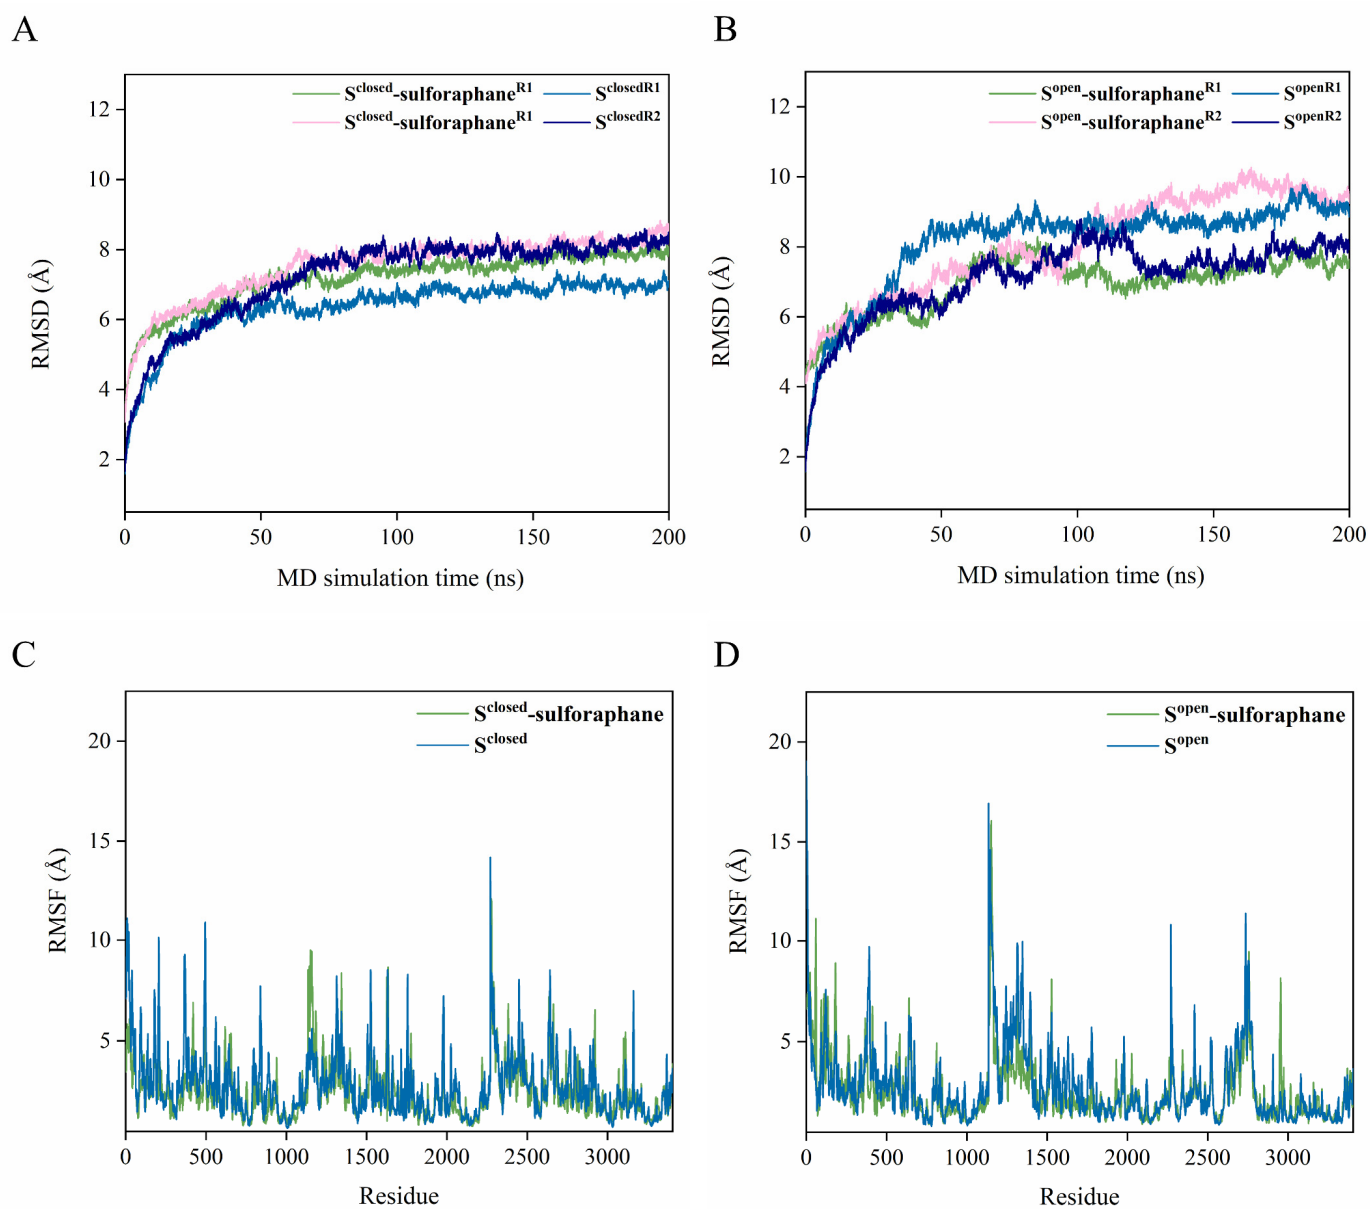

**Figure S5.** RMSD of various systems: (A)  $S^{\text{closed}}$  and (B)  $S^{\text{open}}$ . RMSF per residue for various systems: (C)  $S^{\text{closed}}$  and (D)  $S^{\text{open}}$ .
